# Supplementary material
Source: publisher site journal article supplement (https://www.spandidos-publications.com/5738/downloadSupplementary)
Supplement: Supplementary file 1 [file downloadSupplementary]

## Sheet: Sheet1
Table SII. Sequences of primers for HIF-1α, HMOX1, EGFR, ATF3, and TGFB1.
Species	Gene Symbol	Forward primer, 5'-3'	Reverse primer, 5'-3'
Rat	HIF-1A	TCGGACAACCTCACCAGA	GAAAAAGGGAGCCATCAT
Rat	EGFR	GCCTTCCACAGCCACCTA	GCATCCTTTCATCCCCCT
Rat	TGF-B1	GGCTGAACCAAGGAGACG	CATGAGGAGCAGGAAGGG
Rat	HMOX1	GCTTTAAGCTGGTGATGG	CTGGTGTGTAAGGGATGG
Rat	ATF3	TCACTGGTGTTTGAGGAT	AGGTCTGTTGTTGATGGT
Mouse	mmu-let-7f-1-3p	CCGCTATACAATCTATTGCCTTCC	-
Mouse	mmu-mir-706	CCGCAGAGAAACCCTGTCTC	-
Mouse	mmu-mir-466j	TGTGTGCATGTGCATGTGTGTAA	-
Mouse	U6	CTCGCTTCGGCAGCACA	-
